# Supplementary material for: Prevalence of Deletional Alpha Thalassemia and Sickle Gene in a Tribal Dominated Malaria Endemic Area of Eastern India
Source: PubMed Central journal article supplement (PMC3967634; doi:10.1155/2014/745245), 2014-03-11
Supplement: 745245.f1.pdf [file 745245.f1.pdf]

**Table-1. Distribution of alpha thalassemia genotypes among the severe malaria cases and healthy control:**

|                 | Normal Alpha Globin Genotype $\alpha\alpha/\alpha\alpha$ N(%) | Heterozygous Alpha thalassemia $-\alpha/\alpha\alpha$ N(%) | Homozygous Alpha thalassemia $-\alpha/-\alpha$ N(%) | Total deletional Alpha thalassemia |
|-----------------|---------------------------------------------------------------|------------------------------------------------------------|-----------------------------------------------------|------------------------------------|
| CONTROL (N=271) | 141(52.0)                                                     | 85(31.4)                                                   | 45(16.6)                                            | 130(48.0)                          |
| CASES (N=279)   | 171(61.3)                                                     | 65(23.3)                                                   | 43(15.4)                                            | 108(38.7)                          |

**Table-2. Clinical characteristics of severe malaria cases at the time of admission with respect to their alpha thalassemia status.**

| Clinical features of severe malaria cases. | Total no. of severe malaria cases N=279 | Normal alpha globin genotype $\alpha\alpha/\alpha\alpha$ N=171 (A) | Heterozygous Alpha thalassemia $-\alpha/\alpha\alpha$ N=65 (B) | Homozygous Alpha thalassemia $-\alpha/-\alpha$ N=43 (C) | Total deletional Alpha thalassemia N=108 (D)=(B)+(C) | p value |
|--------------------------------------------|-----------------------------------------|--------------------------------------------------------------------|----------------------------------------------------------------|---------------------------------------------------------|------------------------------------------------------|---------|
| Cerebral malaria                           | 76(27.2)                                | 57 (33.3)                                                          | 12(18.5)                                                       | 7(16.3)                                                 | 19(17.6)                                             | p<0.05  |
| Multi organ dysfunction                    | 42(15.05)                               | 32(18.7)                                                           | 6(9.23)                                                        | 4(9.3)                                                  | 10(9.3)                                              | p<0.05  |
| Anemia                                     | 45(16.13)                               | 29(16.9)                                                           | 10(15.4)                                                       | 6(13.9)                                                 | 16(14.8)                                             | p>0.05  |
| Jaundice                                   | 83(29.7)                                | 61(35.7)                                                           | 14(21.5)                                                       | 8(18.6)                                                 | 22(20.4)                                             | p<0.05  |
| Acute renal failure                        | 89(31.9)                                | 67(39.2)                                                           | 12(18.5)                                                       | 10(23.3)                                                | 22(20.4)                                             | p<0.001 |
| Fatal outcome                              | 24(8.6)                                 | 19(11.1)                                                           | 3(4.6)                                                         | 1(2.3)                                                  | 4(3.7)                                               | p<0.05  |
